# Supplementary material for: Postoperative anaemia might be a risk factor for postoperative delirium and prolonged hospital stay: A secondary analysis of a prospective cohort study
Source: PubMed Central journal article supplement (PMC7034819; doi:10.1371/journal.pone.0229325), 2020-02-21
Supplement: pone.0229325.s002.pdf [file pone.0229325.s002.pdf]

# Study protocol

| Assessment                                              | Screening/<br>baseline        | Narcosis<br>induction | Surgery           | Admission in<br>PACU | Discharge of<br>PACU          | 24h after | 2-3 days<br>after |
|---------------------------------------------------------|-------------------------------|-----------------------|-------------------|----------------------|-------------------------------|-----------|-------------------|
| Assessment<br>Date                                      | -2 / -1<br>days to<br>surgery | day of<br>surgery     | day of<br>surgery | day of<br>surgery    | day of<br>surgery /<br>1. POD | 1. POD    | 2. - 3. POD       |
| Ex- and inclusion criteria                              | ✓                             |                       |                   |                      |                               |           |                   |
| Medical history including<br>previous medical therapies | ✓                             |                       |                   |                      |                               |           |                   |
| Pre-operation discussion and<br>written consent         | ✓                             |                       |                   |                      |                               |           |                   |
| Physical examination                                    | ✓                             |                       |                   |                      |                               |           |                   |
| Demographics                                            | ✓                             |                       |                   |                      |                               |           |                   |
| Vital parameters                                        | ✓                             | ✓                     | ✓                 | ✓                    | ✓                             | ✓         | ✓                 |
| Medication                                              | ✓                             | ✓                     | ✓                 | ✓                    | ✓                             | ✓         | ✓                 |
| Perioperative parameters                                |                               |                       | ✓                 | ✓                    | ✓                             | ✓         | ✓                 |
| Comorbidities/<br>organcomplications                    | ✓                             | ✓                     | ✓                 | ✓                    | ✓                             | ✓         | ✓                 |
| Cholinesterase activity                                 | ✓                             | ✓                     |                   | ✓                    | ✓                             | ✓         | ✓                 |
| Delirium assessment<br>NU-DESC                          | ✓                             | ✓                     |                   | ✓                    | ✓                             | ✓         | ✓                 |
| Pain (NRS)                                              | ✓                             | ✓                     |                   | ✓                    | ✓                             | ✓         | ✓                 |

POD = postoperative day, PACU = post-anaesthesia care unit, NU-DESC = Nursing Delirium Screening Scale, NRS = numeric rating-scale
