# Supplementary material for: Postoperative anaemia might be a risk factor for postoperative delirium and prolonged hospital stay: A secondary analysis of a prospective cohort study
Source: PLoS One. 2020 Feb 21;15(2):e0229325. doi: 10.1371/journal.pone.0229325 (PMC7034819; doi:10.1371/journal.pone.0229325)
Supplement: S1 File — (PDF) [file pone.0229325.s001.pdf]

# Studienprotokoll

| Visiten                                      | Screening/<br>Baseline | Narkose-<br>einleitung | Operation | Aufnahme<br>PACU | Entlassung<br>PACU | Nach 24h | Nach<br>2-3 d |
|----------------------------------------------|------------------------|------------------------|-----------|------------------|--------------------|----------|---------------|
| Untersuchungen<br>Tage                       | -2 / -1<br>Tage        | OP-Tag                 | OP-Tag    | OP-Tag           | OP-Tag /<br>1. POD | 1. POD   | 2. - 3. POD   |
| Überprüfung der Ein- und Ausschlusskriterien | ✓                      |                        |           |                  |                    |          |               |
| Anamnese/Diagnosen inkl. früherer Therapien  | ✓                      |                        |           |                  |                    |          |               |
| Einverständniserklärung zur Studie           | ✓                      |                        |           |                  |                    |          |               |
| Körperliche Untersuchung                     | ✓                      |                        |           |                  |                    |          |               |
| Demografische Daten                          | ✓                      |                        |           |                  |                    |          |               |
| Vitalparameter                               | ✓                      | ✓                      | ✓         | ✓                | ✓                  | ✓        | ✓             |
| Begleitmedikation                            | ✓                      | ✓                      | ✓         | ✓                | ✓                  | ✓        | ✓             |
| Behandlungsdaten                             |                        |                        | ✓         | ✓                | ✓                  | ✓        | ✓             |
| Begleiterkrankungen/<br>Organkomplikationen  | ✓                      | ✓                      | ✓         | ✓                | ✓                  | ✓        | ✓             |
| Cholinesterase-Aktivität                     | ✓                      | ✓                      |           | ✓                | ✓                  | ✓        | ✓             |
| Delirscreening<br>(Nu-DESC)                  | ✓                      | ✓                      |           | ✓                | ✓                  | ✓        | ✓             |
| Schmerzen (NRS)                              | ✓                      | ✓                      |           | ✓                | ✓                  | ✓        | ✓             |

POD = postoperative day, PACU = post-anaesthesia care unit, NU-DESC = Nursing Delirium Screening Scale, NRS = numeric rating-scale
